# Supplementary material for: Cobalt immobilized on hydroxyapatite as a low-cost and highly effective heterogeneous catalyst for alkenes epoxidation under mild conditions
Source: Royal Society of Chemistry journal article supplement (doi:10.1039/c8ra07168c), 2018-01-01
Supplement: c8ra07168c1.pdf [file c8ra07168c1.pdf]

## Electronic Supporting Information

### Cobalt immobilized on hydroxyapatite as a low-cost and highly effective heterogeneous catalyst for alkenes epoxidation under mild condition.

Pagasukon Mekrattanachai,<sup>a,b</sup> Changyan Cao<sup>\*a,b</sup>, Zhaohua Li<sup>a,b</sup>, Huining Li<sup>a,b</sup>, and Weiguo Song<sup>\*a,b</sup>

<sup>a</sup> Beijing National Laboratory for Molecular Sciences, Laboratory of Molecular Nanostructures and Nanotechnology, CAS Research/Education Center for Excellence in Molecular Sciences Institute of Chemistry, Chinese Academy of Sciences, Beijing 100190 (China)

<sup>b</sup> University of Chinese Academy of Sciences, Beijing 100049 (China)

E-mail: cycao@iccas.ac.cn, [wsong@iccas.ac.cn](mailto:wsong@iccas.ac.cn)

#### Experimental section

**Materials:** All of the chemicals were used as reviewed. Ca(NO<sub>3</sub>)<sub>2</sub>·4H<sub>2</sub>O (99%, Acros), (NH<sub>4</sub>)<sub>2</sub>HPO<sub>4</sub> (99+%, Acros), conc. NH<sub>3</sub> (Beijing Shiji), conc. HCl (Beijing Shiji) conc. HNO<sub>3</sub> (Beijing Shiji), Organic solvents (Beijing Shiji), RuCl<sub>3</sub>·nH<sub>2</sub>O (37%Ru, Shanghai Tuosi Chemical), CoSO<sub>4</sub>·7H<sub>2</sub>O (99.5%, Sinopharm Chemical Reagent Co.Ltd), FeSO<sub>4</sub>·7H<sub>2</sub>O (99~101%, Shantou Xi long Chemical Co., Ltd. ), MnSO<sub>4</sub>·H<sub>2</sub>O (≥99%, Sinopharm Chemical Reagent Co.Ltd ), Cu(OAc)<sub>2</sub>·H<sub>2</sub>O (Beijing shuanghuan huaxue shijichang), Pd(OAc)<sub>2</sub> (98%, Aldrich) iso-butylaldehyde (98%, Alfa Aesar), mesitylene (98+%, Alfa Aesar), cyclohexene (99%, J&K), cis-cyclooctene (95%, Alfa Aesar), cyclododecene (97%, Alfa Aesar), 1-methyl cyclohexene (96%, J&K), 1-phenyl cyclohexene (97%, Alfa Aesar), trans-methyl stilbene (98%, Alfa Aesar), indene (95%, Innochem), norbornene (99%, Alfa Aesar), 1-hexene (97%, J&K), 1-decene (95%, J&K).

**Synthesis of HAP:** The preparation of HAP was synthesized by simple chemical precipitation. A solution of Ca(NO<sub>3</sub>)<sub>2</sub>·4H<sub>2</sub>O (66.8 mmol) in 60 mL DI water was adjusted to pH 11-12 with using concentrated NH<sub>3</sub> solution. Thereafter, the solution was added more 50 mL DI water. A solution of (NH<sub>4</sub>)<sub>2</sub>HPO<sub>4</sub> (40.1 mmol) in 60 ml DI water was also adjusted to pH 11-12 with using concentrated NH<sub>3</sub> solution. Then, more 50 mL deionized water was added. After that, the phosphate solution was added dropwise into calcium nitrate solution to produce a milky white precipitate which was then stirred overnight. The precipitate was filtered, washed with DI water (3×200 mL), dried at 60 °C under vacuum, and calcined at 500 °C for 3 h.

**Synthesis of Co/HAP:** Co metal doped on HAP was prepared with ion exchange method. In brief, the synthesized HAP (1.0 g) was stirred magnetically with 400 mL DI water. Then,  $\text{CoSO}_4 \cdot 7\text{H}_2\text{O}$  aqueous solution was prepared to be  $\text{Co}^{2+}$  precursor (0.4770 g of  $\text{CoSO}_4 \cdot 7\text{H}_2\text{O}$  was dissolved in 100 mL DI water resulting concentration of  $\text{Co}^{2+}$  about 1000 mg/L). After that, the desired amount of Co from aqueous  $\text{CoSO}_4 \cdot 7\text{H}_2\text{O}$  solution was pipetted in to HAP suspension (0.5, 10, 30 and 50 mL were pipetted to prepared 0.05, 1, 3 and 5 wt% of Co immobilized on HAP respectively) and it was further stirred at room temperature for 24 h. The obtained slurry was filtered, washed with deionized water ( $3 \times 200$  mL), and then dried overnight at 60 °C under vacuum, yielding the Co doped on HAP as the light pink powders. For other metals (Ru, Cu, Mn, Pd and Fe) immobilized on HAP, metal salts ( $\text{RuCl}_3 \cdot n\text{H}_2\text{O}$ ,  $\text{Cu}(\text{OAc})_2 \cdot \text{H}_2\text{O}$ ,  $\text{MnSO}_4 \cdot \text{H}_2\text{O}$ ,  $\text{Pd}(\text{OAc})_2$  and  $\text{FeSO}_4 \cdot 7\text{H}_2\text{O}$ )<sup>3-6</sup> were used as precursors following the same procedure that mentioned above.

**Characterizations:** All of the prepared catalysts were characterized with various techniques which consisted of XRD (D8 Advance, Bruker using  $\text{Cu-K}\alpha$  radiation with wavelength 1.5418 Å, 40 kV, 40 mA), ICP-AES (IPPE-9000, Shimadzu Plasma Atomic Emission Spectrometer), TEM (JEOL 2100F electron microscope), SEM (FESEM, JEOL-6701F electron microscope), BET (Quantachrome Instrument, Autosorb-1).

**Epoxidation of Alkenes:** The alkene epoxidation was operated in round bottom glass and mesitylene was used as internal standard. Typically 5 mL of acetonitrile or dichloromethane, 1 mmol of alkene, 5 mmol of *iso*-butyraldehyde and 20 mg of catalyst were mixed with stirring under  $\text{O}_2$  bubbling. For reusability test, the catalyst was separated by centrifugation, washed with  $\text{CH}_2\text{Cl}_2$ , then dried at 60 °C overnight. The starting materials and products were determined by GC (Shimadzu GC-2010-Plus) equipped with a flame ionization detector (FID) and a Rtx-5 capillary column (0.25 mm in diameter, 30 m in length) and GC-MS (Shimadzu GCMS-QP2010). The reactivity of the prepared catalysts was reported as % conversion of substrate and % selectivity of the epoxide product. Moreover, the BET surface area of the used 0.05 wt% Co/HAP was determined by  $\text{N}_2$  adsorption-desorption isotherms. The up-scale of 5 mmol cyclohexene epoxidation in 25 mL  $\text{CH}_3\text{CN}$ , with 25 mmol *iso*-butyraldehyde was tested over 100 mg of 0.05 wt% Co/HAP under  $\text{O}_2$  balloon at 30 °C for 4 h. After that, the catalyst was separated by centrifugation, washed with  $\text{CH}_3\text{CN}$  and dried at 80 °C overnight. The recovered catalyst was then determined by  $\text{N}_2$  adsorption-desorption isotherm.

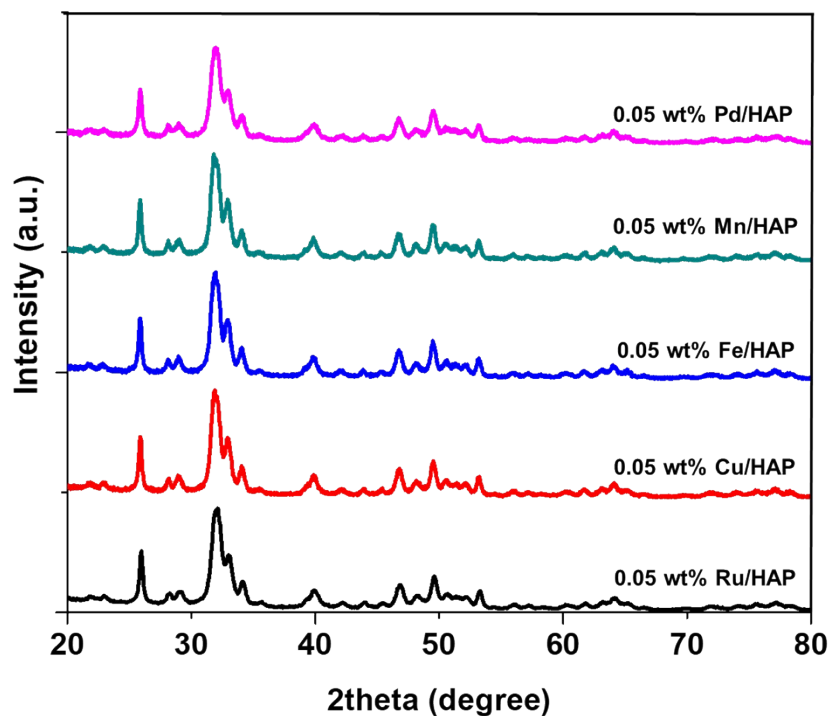

Fig. S1 XRD spectra of various metals supported HAP.

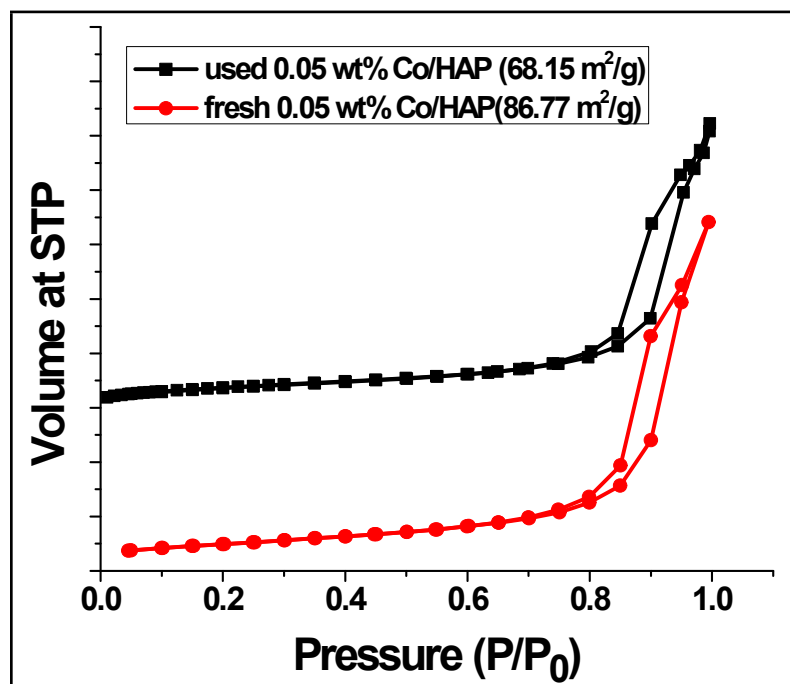

Fig. S2 N<sub>2</sub> adsorption-desorption isotherms of the fresh and used 0.05 wt% Co/HAP catalyst.

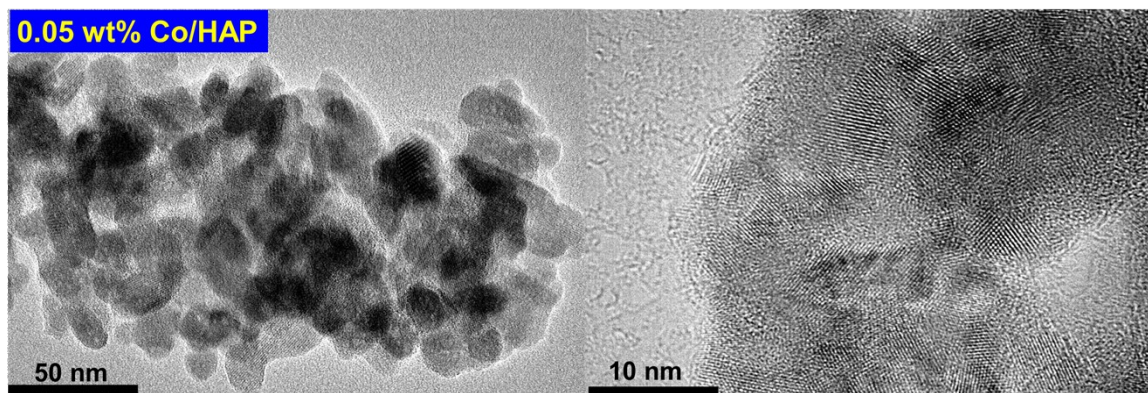

Fig. S3 TEM images of 0.05 wt% Co/HAP catalyst.

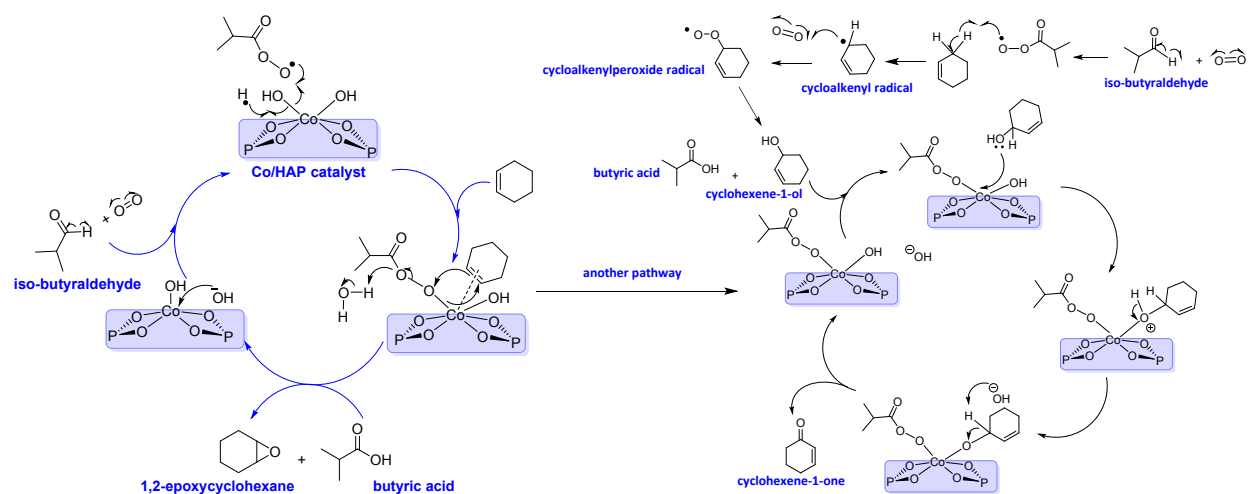

Scheme S1. A plausible mechanism for cyclohexene epoxidation over 0.05 wt% Co/HAP catalyst.

**Table S1.** The content of various metals and higher Co loading immobilized on HAP from ICP-AES analysis.

| Catalyst        | wt% metal from ICP-AES |
|-----------------|------------------------|
| 0.05 wt% Co/HAP | 0.02                   |
| 0.05 wt% Ru/HAP | 0.06                   |
| 0.05 wt% Fe/HAP | 0.09                   |
| 0.05 wt% Mn/HAP | 0.04                   |
| 0.05 wt% Cu/HAP | 0.06                   |
| 0.05 wt% Pd/HAP | 0.07                   |
| 1 wt% Co/HAP    | 0.75                   |
| 3 wt% Co/HAP    | 1.28                   |
| 5% wt% Co/HAP   | 1.58                   |

**Table S2.** Solvent effect in epoxidation of cyclohexene using 0.05 wt% Co/HAP as catalyst.

| Solvent                             | Conv.%     | Sel.%     |
|-------------------------------------|------------|-----------|
| <b>CH<sub>2</sub>Cl<sub>2</sub></b> | <b>100</b> | <b>95</b> |
| CH <sub>3</sub> CN                  | 83         | 93        |
| THF                                 | 13         | 33        |
| MeOH                                | 46         | 13        |
| EtOAc                               | 79         | 89        |
| heptane                             | 45         | 78        |
| toluene                             | 92         | 92        |

Reaction conditions: 0.05 wt% Co/HAP (20 mg), cyclohexene (1 mmol) solvent (5 mL), iso-butylaldehyde (5 mmol), 30 °C, O<sub>2</sub> balloon, 2 h. reaction time.
